# Supplementary material for: Microbial Ligand Costimulation Drives Neutrophilic Steroid-Refractory Asthma
Source: PubMed Central journal article supplement (PMC4532492; doi:10.1371/journal.pone.0134219), 2015-08-11

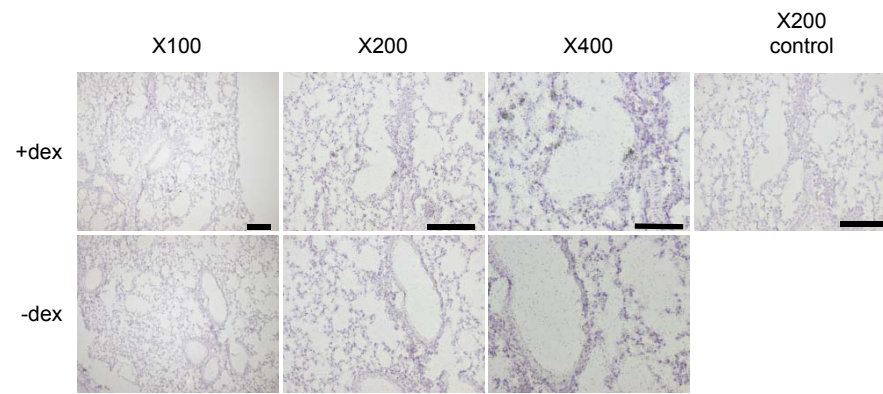

Supplement: pone.0134219.s009.pdf [file pone.0134219.s009.pdf]
